# Supplementary material for: Colorimetric detection of Hg(ii) based on the gold amalgam-triggered reductase mimetic activity in aqueous solution by employing AuNP@MOF nanoparticles
Source: Royal Society of Chemistry journal article supplement (doi:10.1039/c9an02615k), 2020-01-01
Supplement: c9an02615k1.pdf [file c9an02615k1.pdf]

## Supporting Information

### **Colorimetric detection of Hg (II) based on the gold amalgam-triggered reductase mimetic activity in aqueous solutions by employing AuNP@Fe-TCPP-MOF nanoparticles**

Xiuli Wang, Hao Wang, Lan Guo, Guang Chen, Rongmei Kong, Fengli Qu, Lian Xia\*

Key Laboratory of Life-Organic Analysis of Shandong Province, Qufu Normal University, Qufu, Shandong 273165, PR China

\*Corresponding author: Lian Xia

E-mail address: [xialian01@163.com](mailto:xialian01@163.com)

Tel/fax: (+86) 537 4458301

**Table of Contents:**

**Fig. S1** TEM image of AuNP@MOF after being treated with  $\text{Hg}^{2+}$  ions

**Fig. S2** The UV spectrum of the MB system before and after incubation with AuNPs@MOF and the simple mixture of Au NPs and MOF

**Fig. S3** Optimization of experimental conditions

**Table S1** Recovery of tap water, Yihe river water samples containing different concentrations of  $\text{Hg}^{2+}$  measured by UV–Vis spectrometry

**Table S2** The comparison of different methods for  $\text{Hg}^{2+}$  detection

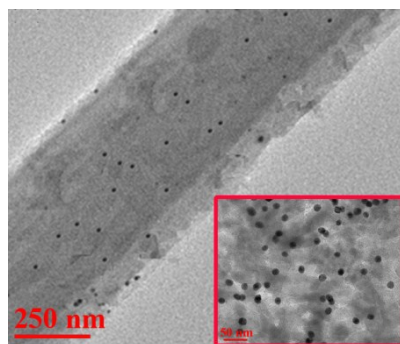

**Fig. S1** TEM image of AuNP@MOF after being treated with  $\text{Hg}^{2+}$  ions

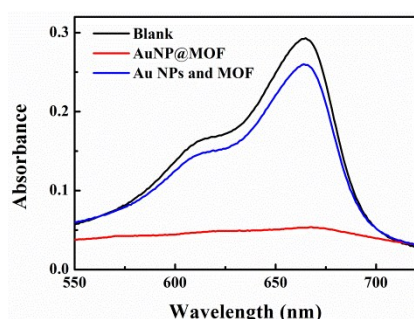

**Fig. S2** The UV spectrum of the MB system before (black line) and after incubation with AuNPs@MOF (red line) and the simple mixture of Au NPs and MOF (blue line)

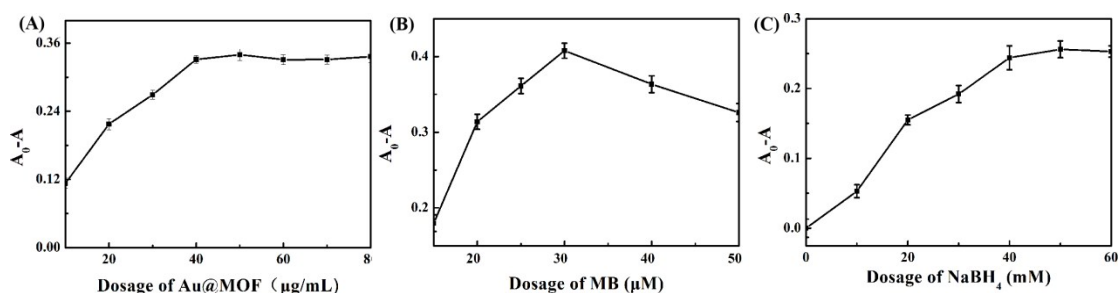

**Fig. S3** Optimization of sensing conditions. (A) The effect of amount of AuNP@MOF on the response signal;  $A_0$  represents the absorbance of the original MB in the sensing system at 665 nm,  $A$  represents the absorbance of MB in sensing system by adding various dosage of AuNP@MOF with  $\text{Hg}^{2+}$  at 665 nm. (B) The effect of MB concentration on the response signal.  $A_0$  represents the absorbance of the original MB in the sensing system at 665 nm;  $A$  represents the absorbance of MB in sensing system by adding certain  $\text{Hg}^{2+}$  at 665 nm. (C) The effect of  $\text{NaBH}_4$  concentration on the response signal.  $A_0$  represents the absorbance of the original  $\text{NaBH}_4$  in the sensing system at 665 nm;  $A$  represents the absorbance of  $\text{NaBH}_4$  in sensing system by adding certain  $\text{Hg}^{2+}$  at 665 nm

Table S1 Recovery of tap water, Yihe river water samples containing different concentrations of  $\text{Hg}^{2+}$  measured by UV–Vis spectrometry

| Sample             | $\text{Hg}^{2+}$ spiked (pM) | $\text{Hg}^{2+}$ detected (pM)<br>Mean $\pm$ SD | Recovery (%)      |
|--------------------|------------------------------|-------------------------------------------------|-------------------|
| Tap water 1        | 200                          | 194.68 $\pm$ 0.11                               | 97.34 $\pm$ 0.06  |
| Tap water 2        | 250                          | 253.40 $\pm$ 0.05                               | 101.36 $\pm$ 0.02 |
| Tap water 3        | 300                          | 298.68 $\pm$ 0.13                               | 99.56 $\pm$ 0.04  |
| Yihe river water 1 | 200                          | 202.92 $\pm$ 0.03                               | 101.46 $\pm$ 0.02 |
| Yihe river water 2 | 250                          | 249.65 $\pm$ 0.05                               | 99.86 $\pm$ 0.02  |
| Yihe river water 3 | 300                          | 303.90 $\pm$ 0.04                               | 101.13 $\pm$ 0.01 |

Table S2 The comparison of different methods for  $\text{Hg}^{2+}$  detection

| Material                                  | Method                       | Linear range         | Detection limit | Time      | Ref       |
|-------------------------------------------|------------------------------|----------------------|-----------------|-----------|-----------|
| Au/Hexanedithiol/ Rhodamine B             | Fluorescence                 | 0-19.9 $\mu\text{M}$ | 2.49 nM         | 2 mins    | 1         |
| Colorimetric Sensor based on G-Quadruplex | Colorimetric method          | 250-1250 nM          | 50 nM           | 240 min   | 2         |
| Carbon nanodots                           | Fluorescence                 | 0-3 $\mu\text{M}$    | 4.2 nM          | 5 mins    | 3         |
| Antibodies/BSA-glutathione                | Cold-vapor atomic absorption | 2.5-49.9 nM          | 2.99 nM         | few weeks | 4         |
| DNA/GO                                    | Fluorescence                 | 0-8 nM               | 1.5 nM          | 10 mins   | 5         |
| AuNP/ Iron-porphyrin MOF                  | UV–vis spectra               | 200- 400 pM          | 103 pM          | 2 s       | This work |

## References

- 1 K. Daware, R. Shinde, R. S.Kalubarme, M. Kasture, A. Pandey, C. Terashima, and S. W. Gosavi, *Sensor. Actuat. B-Chem.*, 2018, 265, 547-555.
- 2 L. Tao, S.-J. Dong, and E.-K. Wang, *Anal. Chem.*, 2009, 81(6), 2144-2149.
- 3 L. Zhou, Y. Lin, Z. Huang, J. Ren, and X. Qu, *Chem. Commun. (Camb)*, 2012, 48(8), 1147-1149.
- 4 D. E. Wylie, L. D. Carlson, R. Carlson, F. W. Wagner, and S. M. Schuster, *Anal. Biochem.*, 1991, 194(2), 381-387.
- 5 Y. Feng, X. Shao, K. Huang, J. Tian, X. Mei, Y. Luo, and W. Xu, *Chem. Commun.*, 2018, 54(58), 8036-8039.
